# Supplementary material for: Rare-earth-metal-catalyzed highly 3,4-regioselective polymerization of polar 1-phenyl-1,3-butadiene derivates
Source: Royal Society of Chemistry journal article supplement (doi:10.1039/d3py00798g), 2023-01-01
Supplement: d3py00798g1.pdf [file d3py00798g1.pdf]

## Supporting Information

### **Rare-earth Metal-Catalyzed Highly 3,4-Regioselective Polymerization of Polar 1-Phenyl-1,3-Butadiene Derivates**

Fen You,<sup>+</sup> Xiaoyu Wang,<sup>+</sup> Wenyu Shi, Xuyang Yan, and Xiaochao Shi

Department of Polymer Materials, School of Materials Science and Engineering, Shanghai  
University, Materials Building, Nanchen Street 333, Shanghai 200444, China.

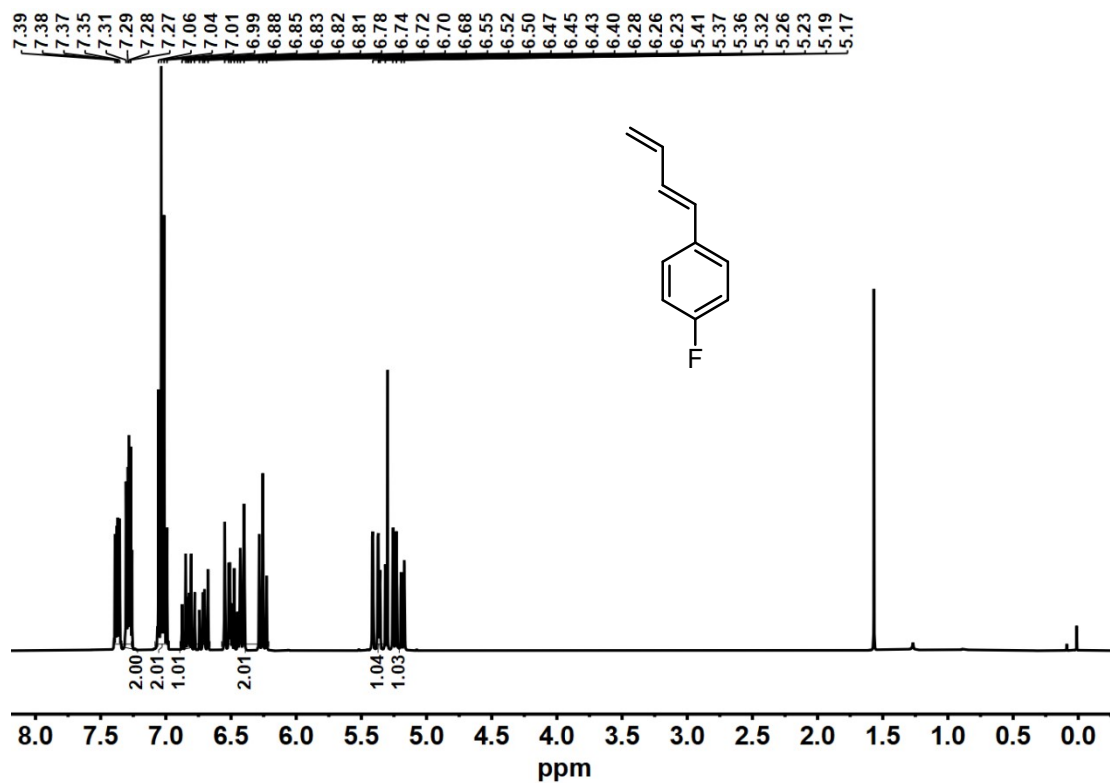

Figure S1. <sup>1</sup>H NMR spectrum of monomer *p*-FPB. (400 MHz, CDCl<sub>3</sub>, 25 °C)

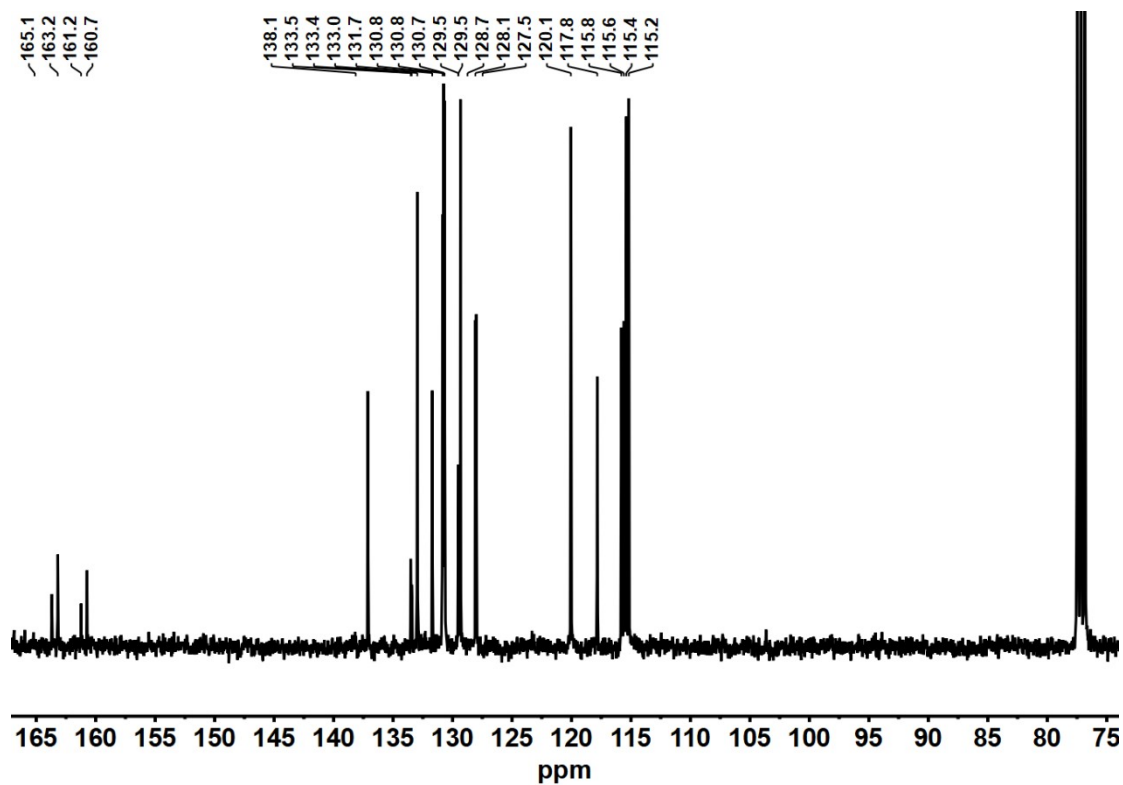

Figure S2. <sup>13</sup>C NMR spectrum of monomer *p*-FPB. (400 MHz, CDCl<sub>3</sub>, 25 °C)

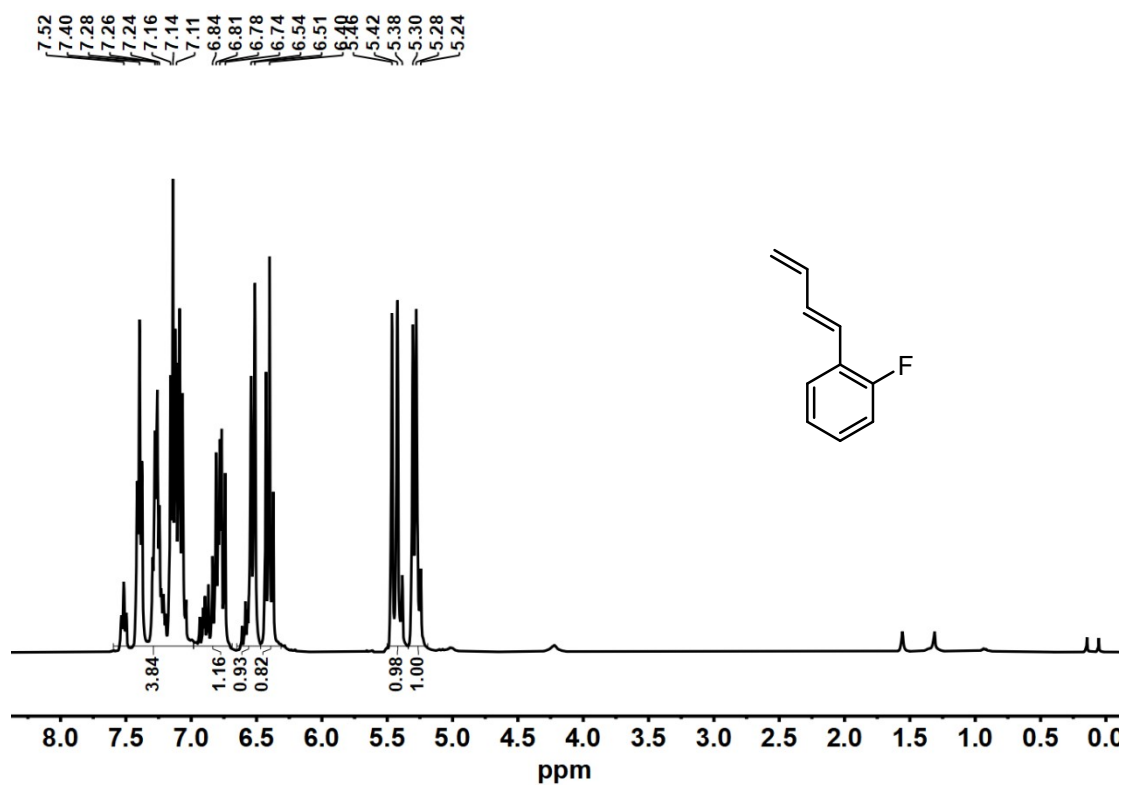

Figure S3. <sup>1</sup>H NMR spectrum of monomer *o*-FPB. (400 MHz, CDCl<sub>3</sub>, 25 °C)

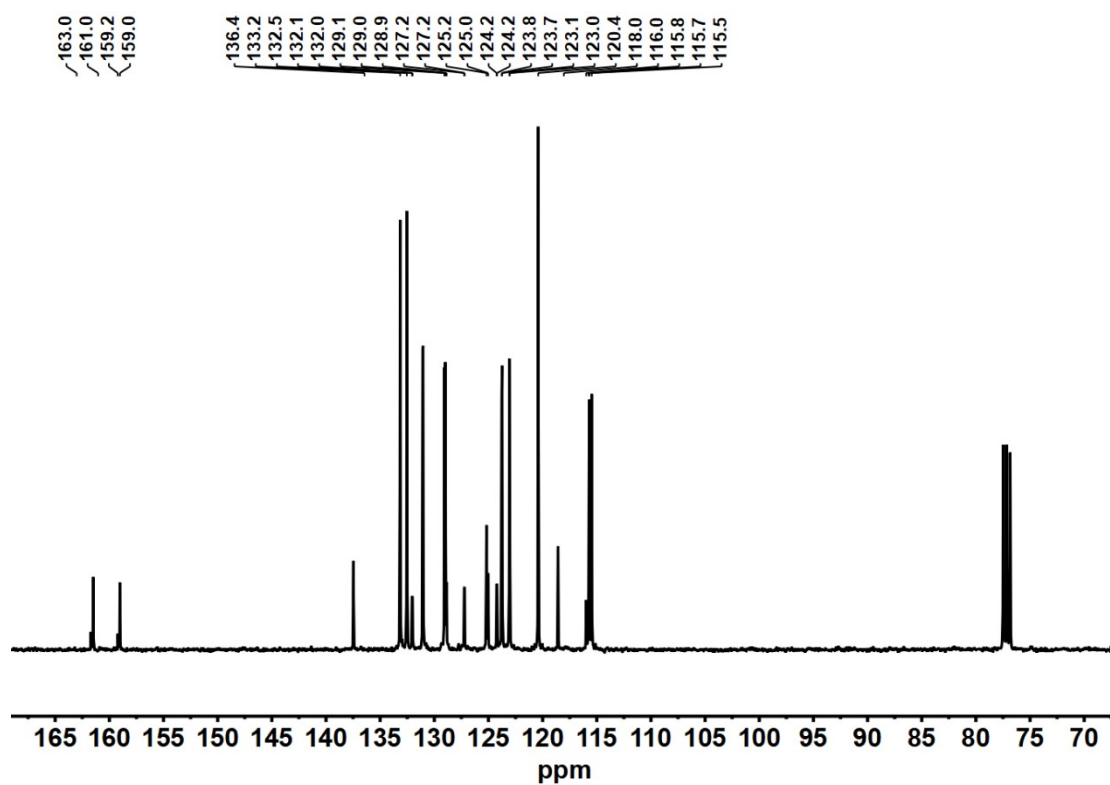

Figure S4. <sup>13</sup>C NMR spectrum of monomer *o*-FPB. (400 MHz, CDCl<sub>3</sub>, 25 °C)

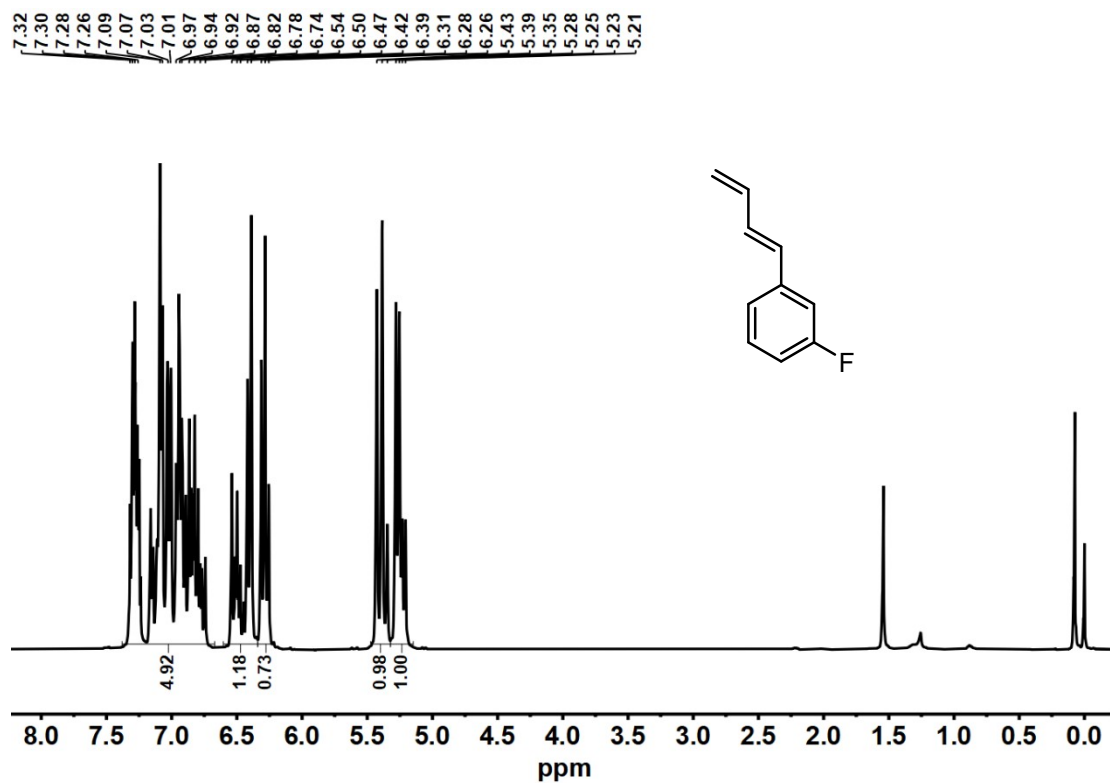

Figure S5.  $^1\text{H}$  NMR spectrum of monomer *m*-FPB. (400 MHz,  $\text{CDCl}_3$ , 25  $^\circ\text{C}$ )

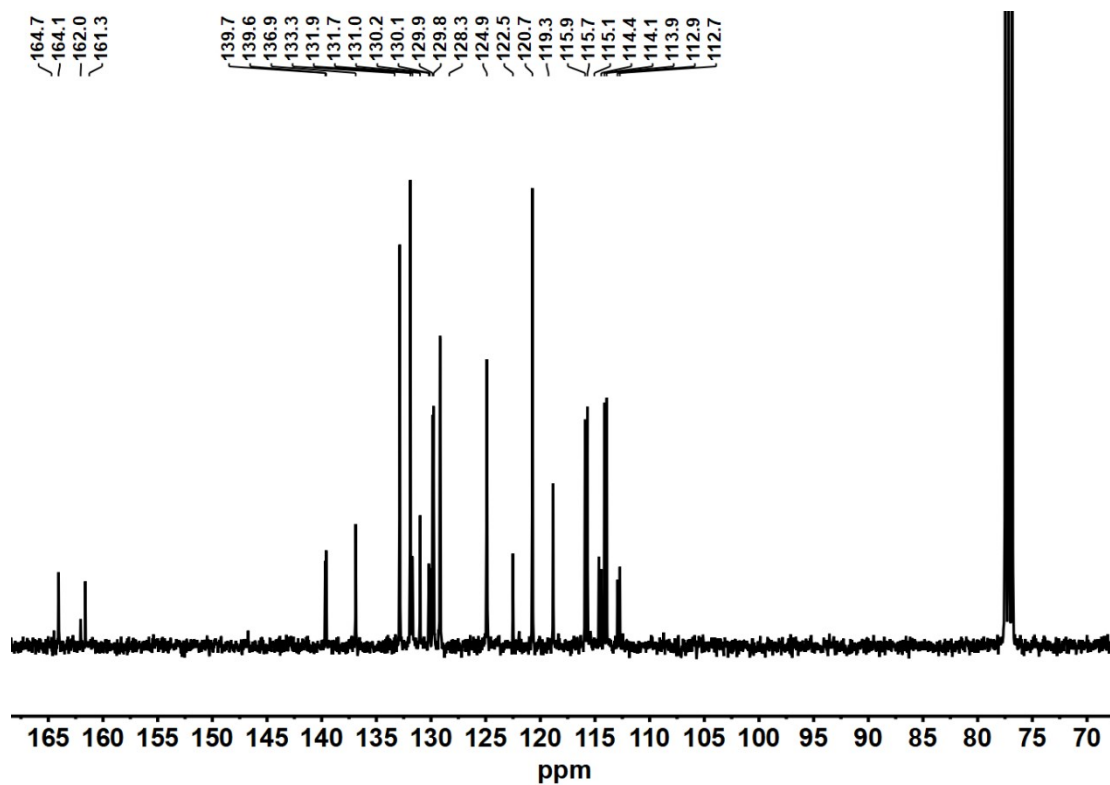

Figure S6.  $^{13}\text{C}$  NMR spectrum of monomer *m*-FPB. (400 MHz,  $\text{CDCl}_3$ , 25  $^\circ\text{C}$ )

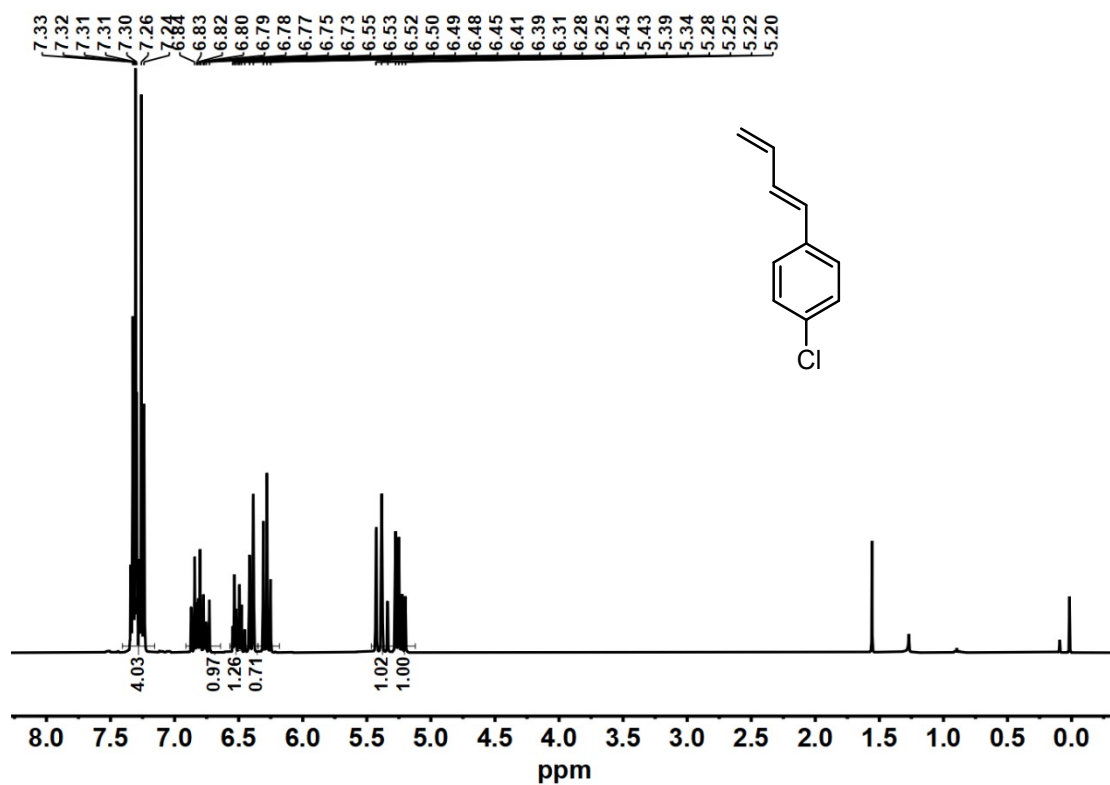

Figure S7.  $^1\text{H}$  NMR spectrum of monomer *p*-CIPB. (400 MHz,  $\text{CDCl}_3$ , 25  $^\circ\text{C}$ )

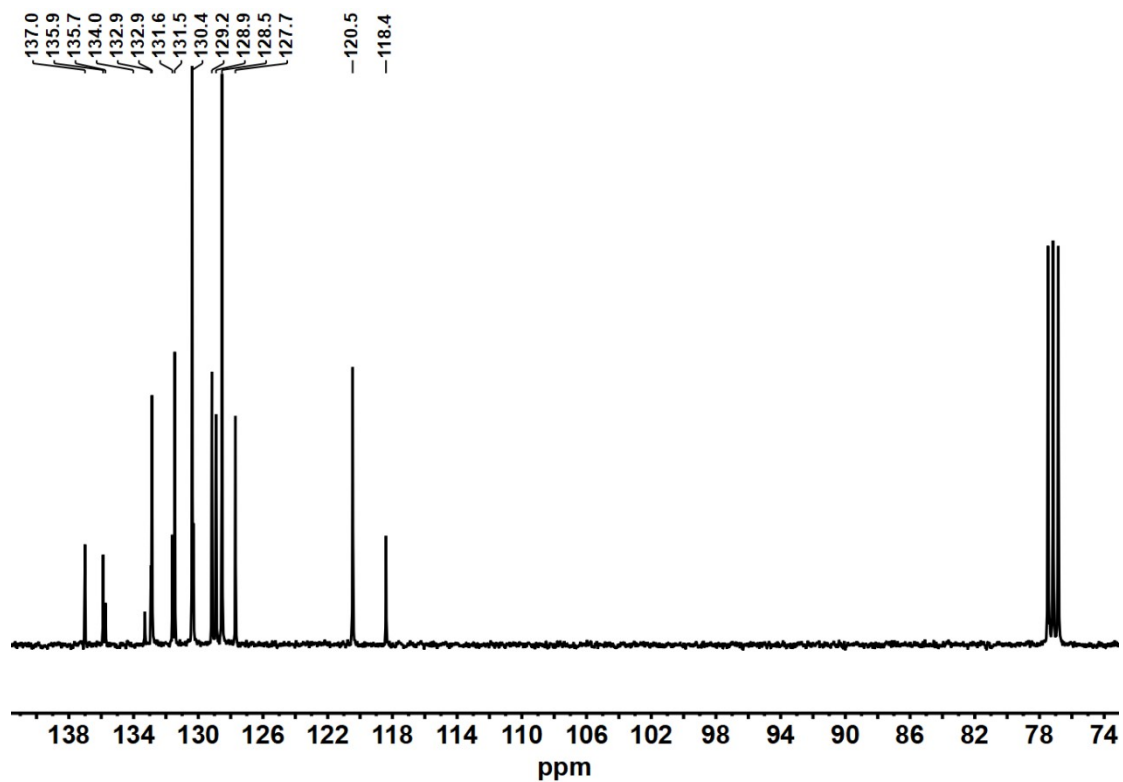

Figure S8.  $^{13}\text{C}$  NMR spectrum of monomer *p*-CIPB. (400 MHz,  $\text{CDCl}_3$ , 25  $^\circ\text{C}$ )

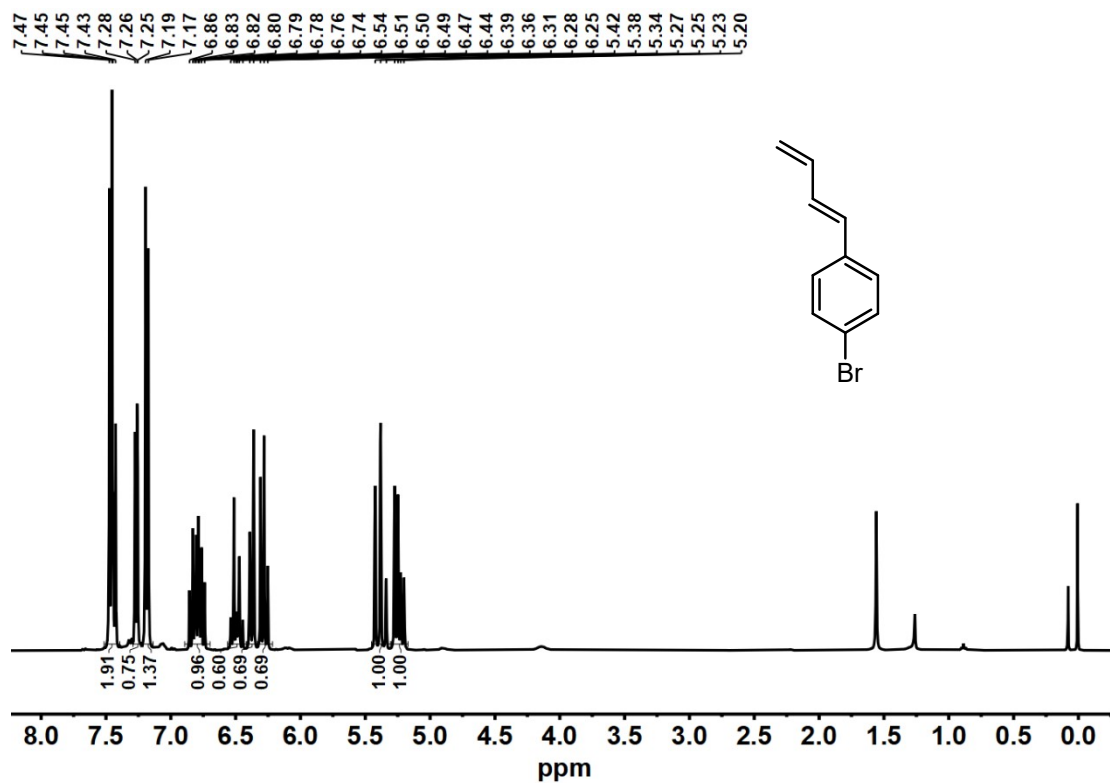

Figure S9. <sup>1</sup>H NMR spectrum of monomer *p*-BrPB. (400 MHz, CDCl<sub>3</sub>, 25 °C)

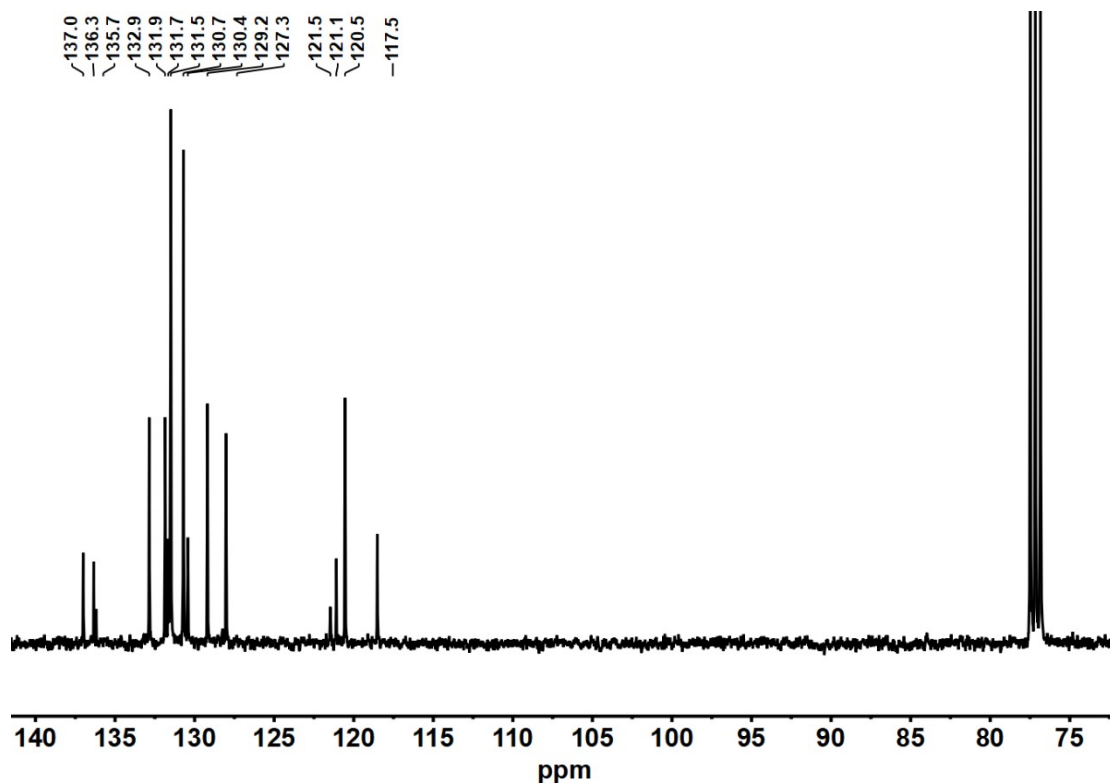

Figure S10. <sup>13</sup>C NMR spectrum of monomer *p*-BrPB. (400 MHz, CDCl<sub>3</sub>, 25 °C)

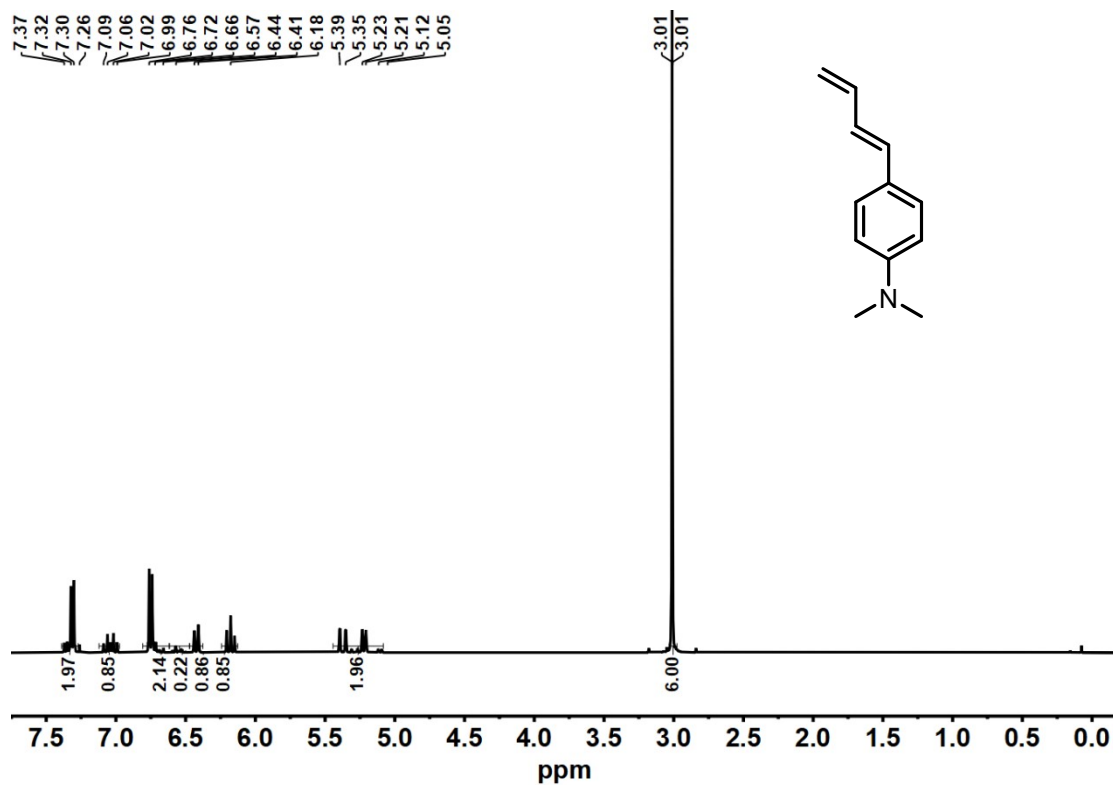

Figure S11. <sup>1</sup>H NMR spectrum of monomer *p*-NPB. (400 MHz, CDCl<sub>3</sub>, 25 °C)

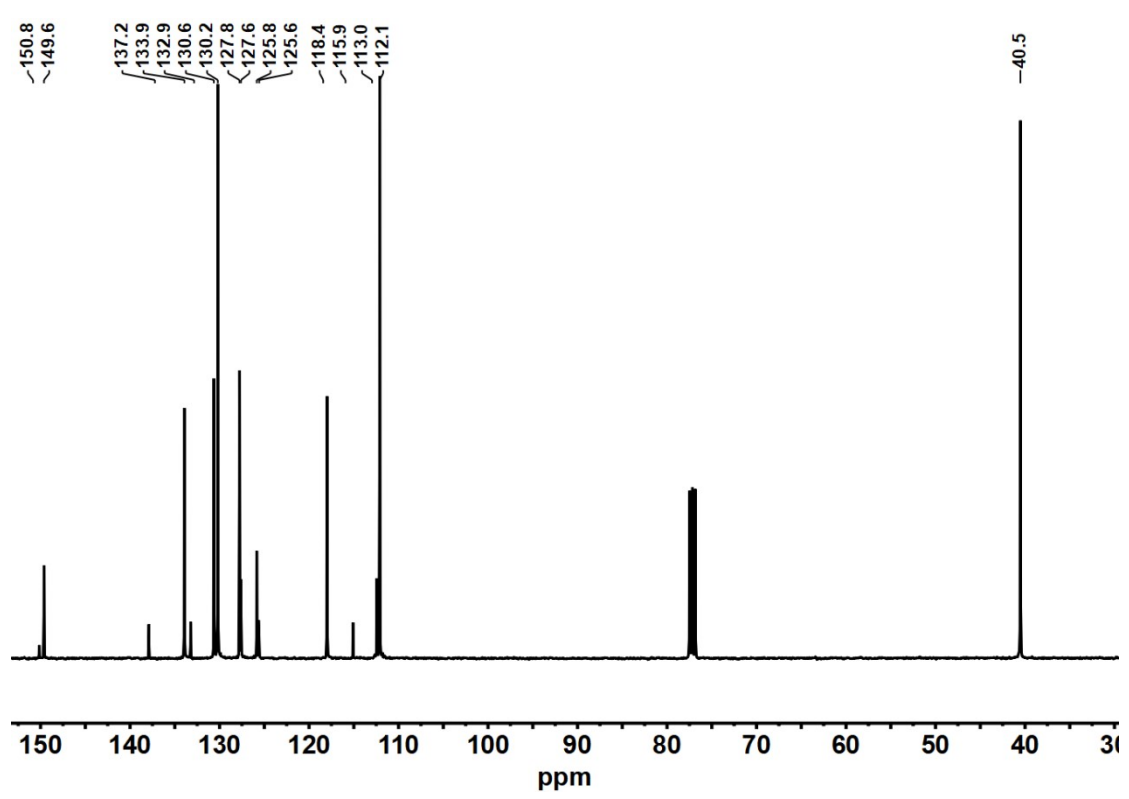

Figure S12. <sup>13</sup>C NMR spectrum of monomer *p*-NPB. (400 MHz, CDCl<sub>3</sub>, 25 °C)

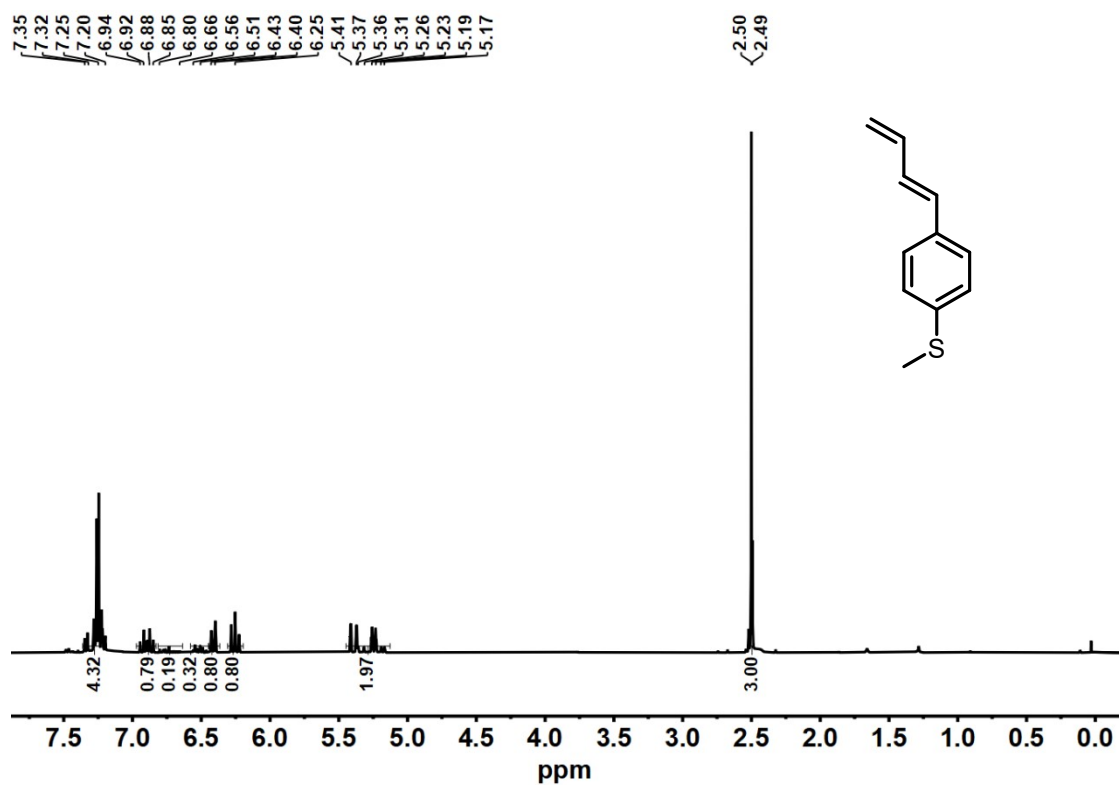

Figure S13.  $^1\text{H}$  NMR spectrum of monomer *p*-SPB. (400 MHz,  $\text{CDCl}_3$ , 25 °C)

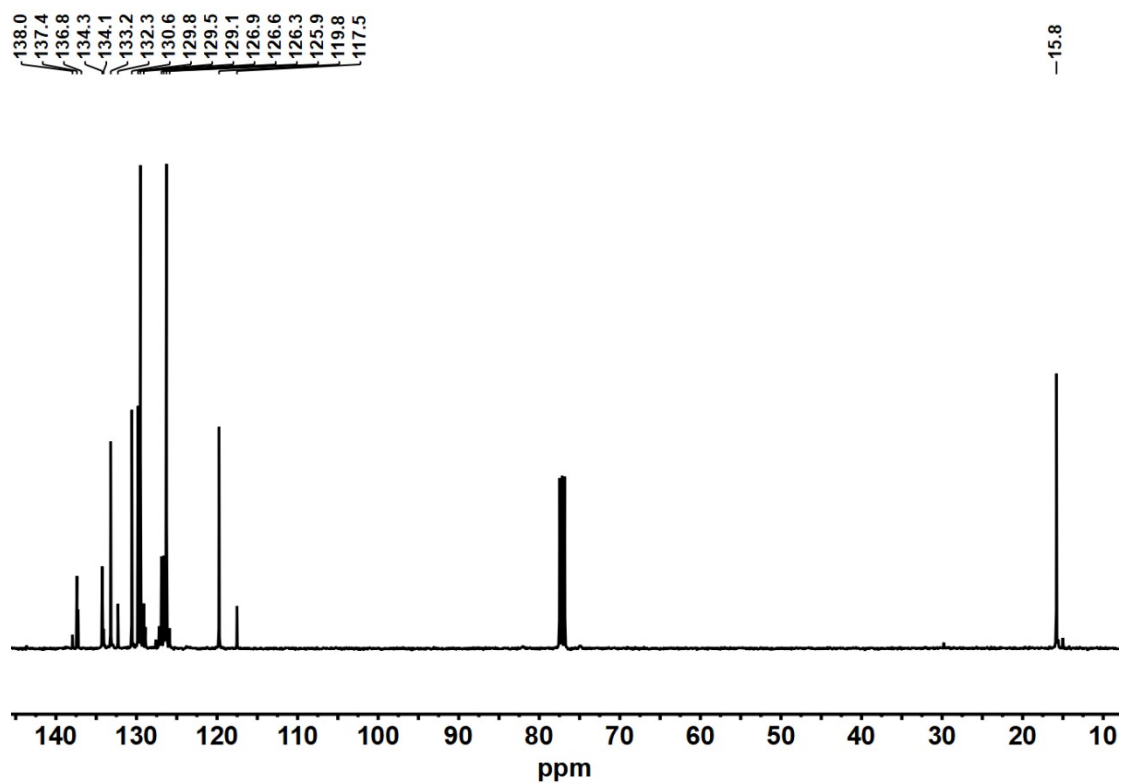

Figure S14.  $^{13}\text{C}$  NMR spectrum of monomer *p*-SPB. (400 MHz,  $\text{CDCl}_3$ , 25 °C)



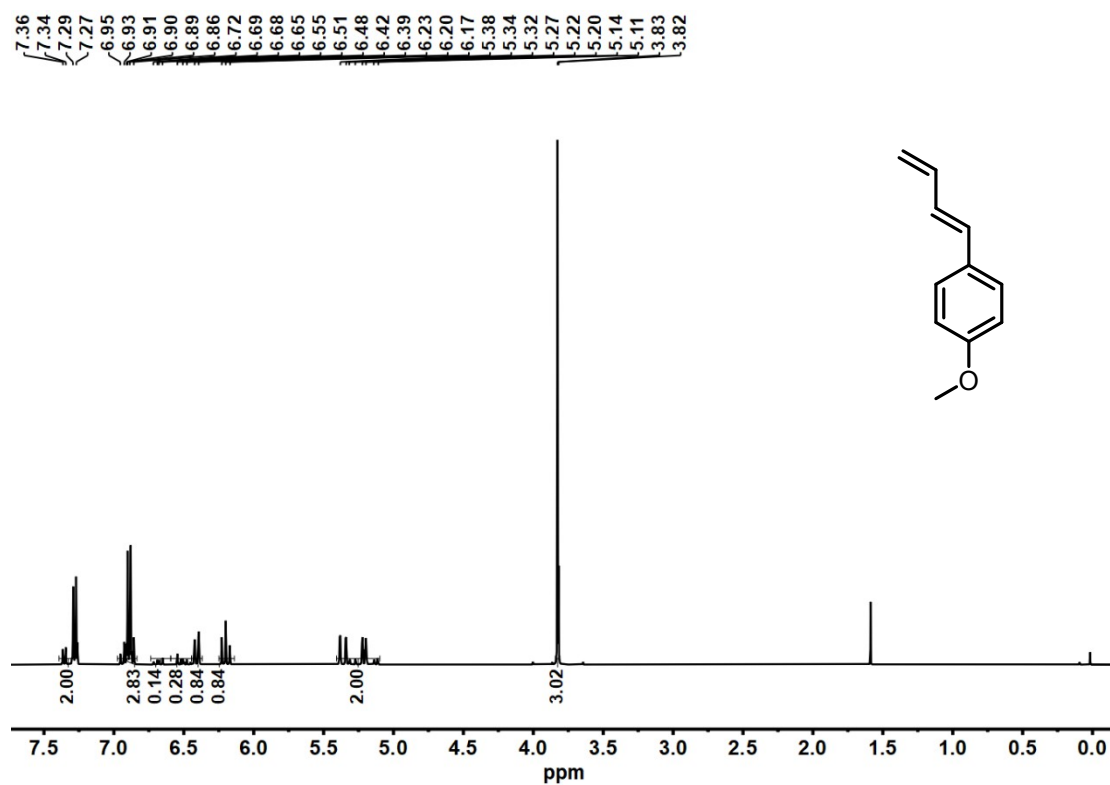

Figure S15.  $^1\text{H}$  NMR spectrum of monomer *p*-OPB. (400 MHz,  $\text{CDCl}_3$ , 25  $^\circ\text{C}$ )

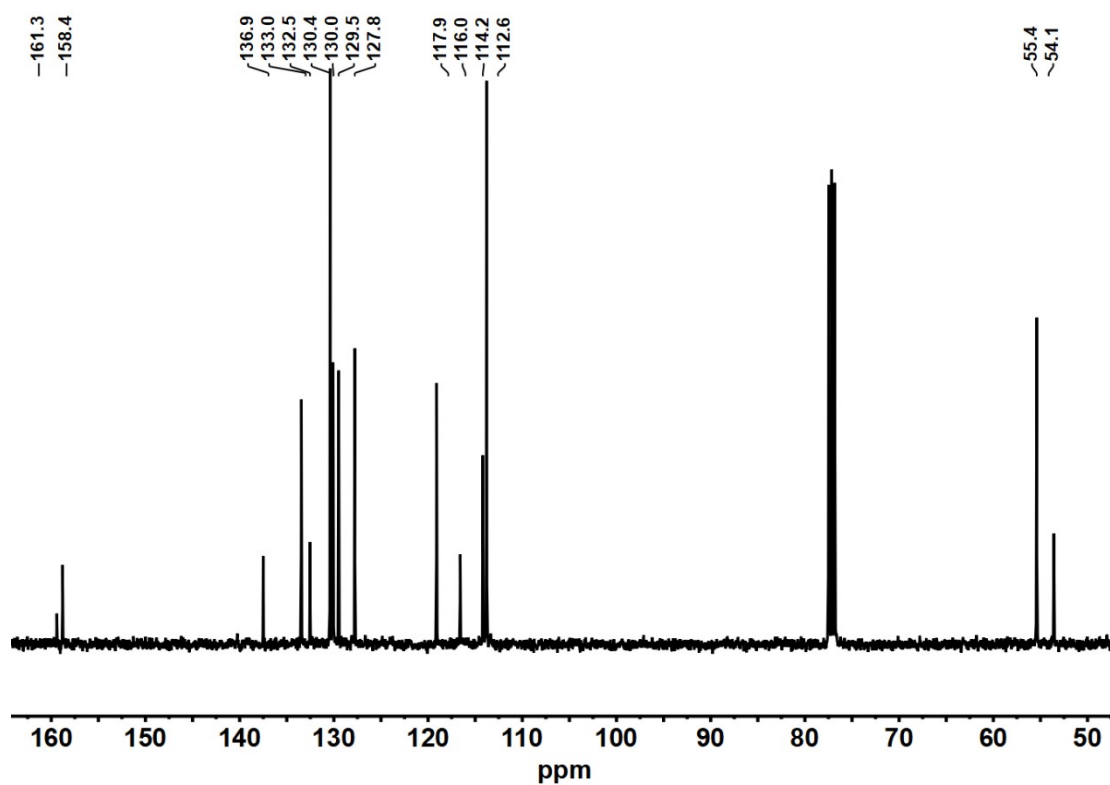

Figure S16.  $^{13}\text{C}$  NMR spectrum of monomer *p*-OPB. (400 MHz,  $\text{CDCl}_3$ , 25  $^\circ\text{C}$ )

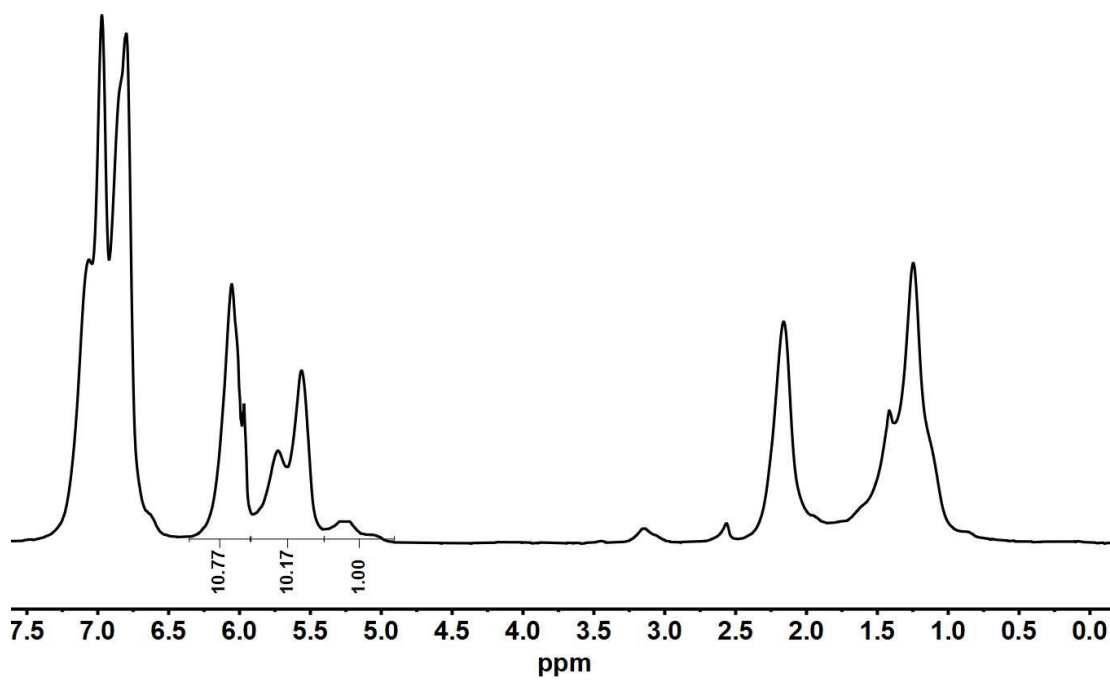

Figure S17.  $^1\text{H}$  NMR spectrum of poly(*p*-FPB) prepared by complex **4**. (Entry 5, Table 1)

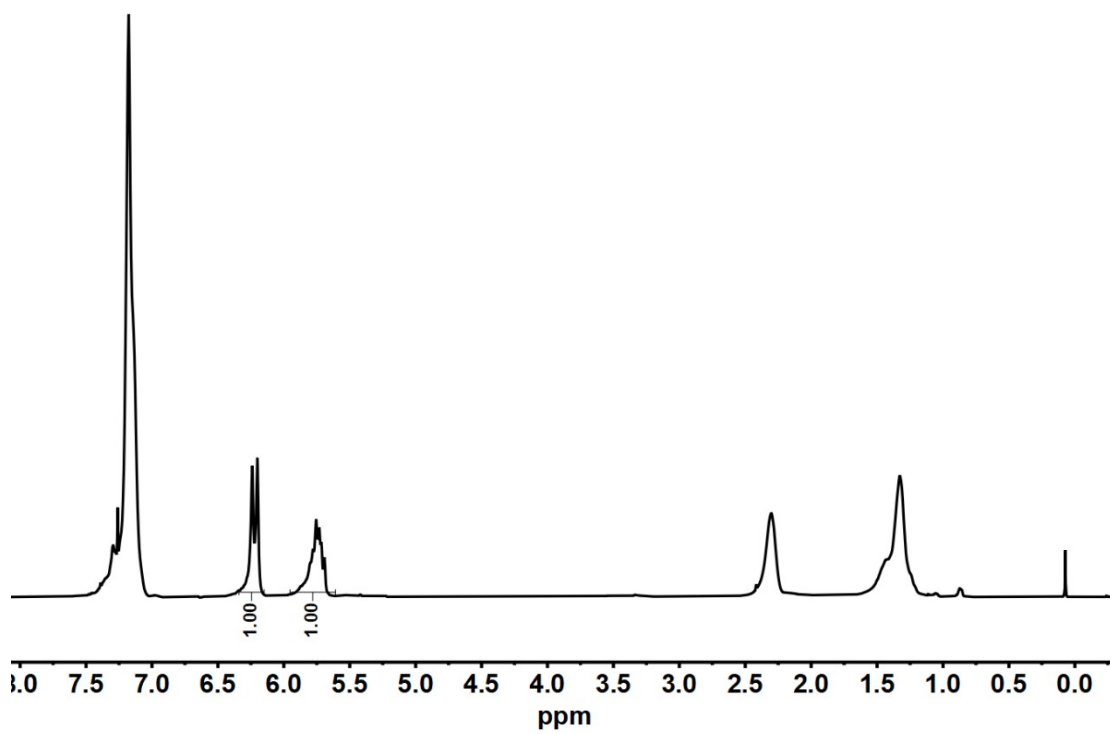

Figure S18.  $^1\text{H}$  NMR spectrum of poly(1PB) prepared by complex **1**. (Entry 1, Table 2)

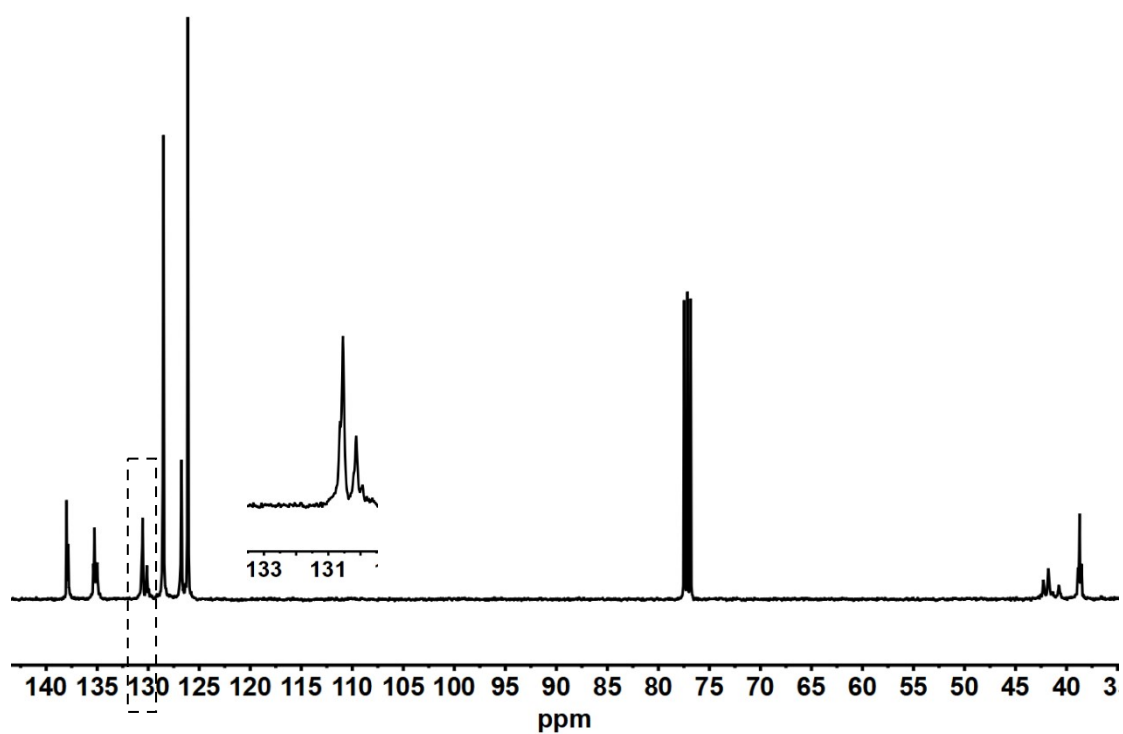

Figure S19.  $^{13}\text{C}$  NMR spectrum of poly(**1PB**) prepared by complex **1**. (Entry 1, Table 2)

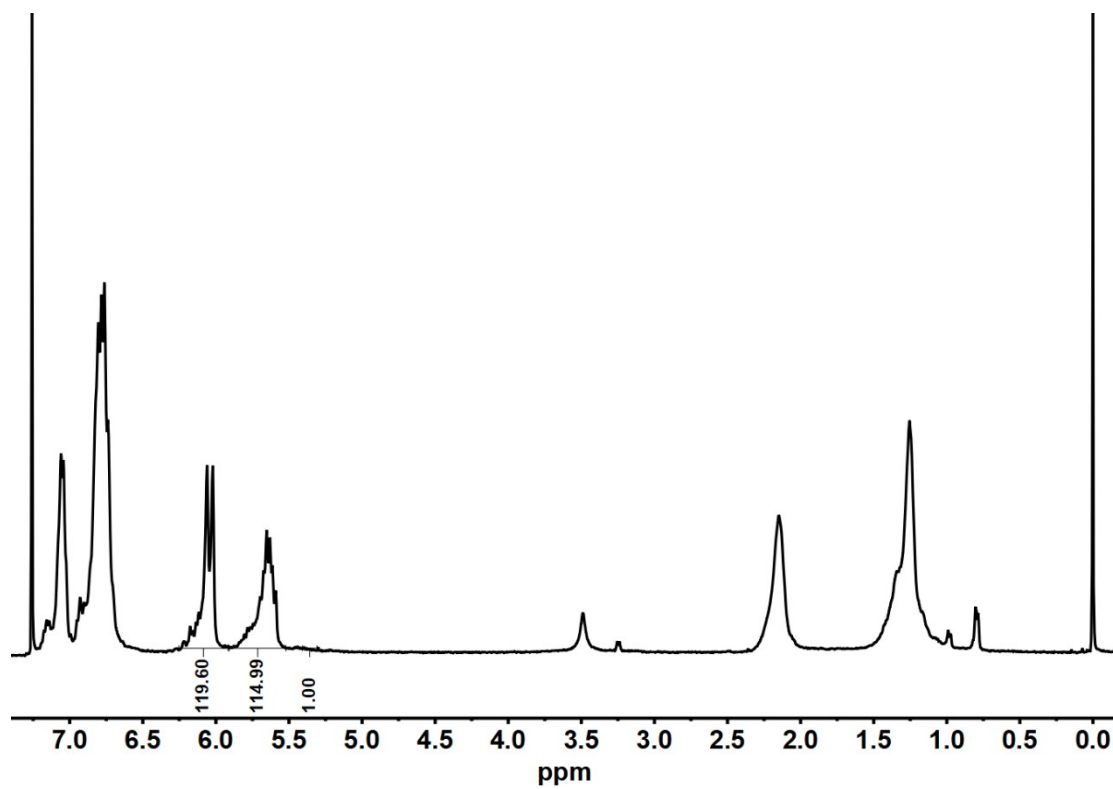

Figure S20  $^1\text{H}$  NMR spectrum of poly(*m*-**FPB**) prepared by complex **1**. (Entry 2, Table 2)

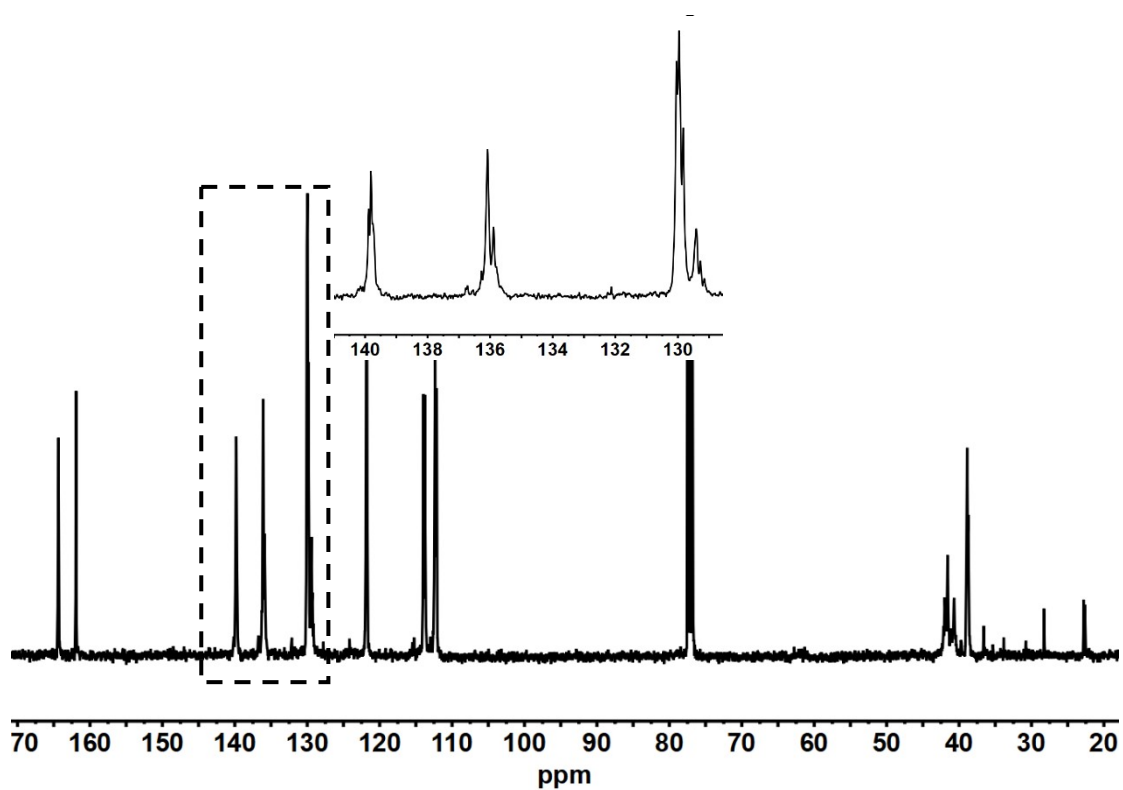

Figure S21.  $^{13}\text{C}$  NMR spectrum of poly(*m*-FPB) prepared by complex **1**. (Entry 2, Table 2)

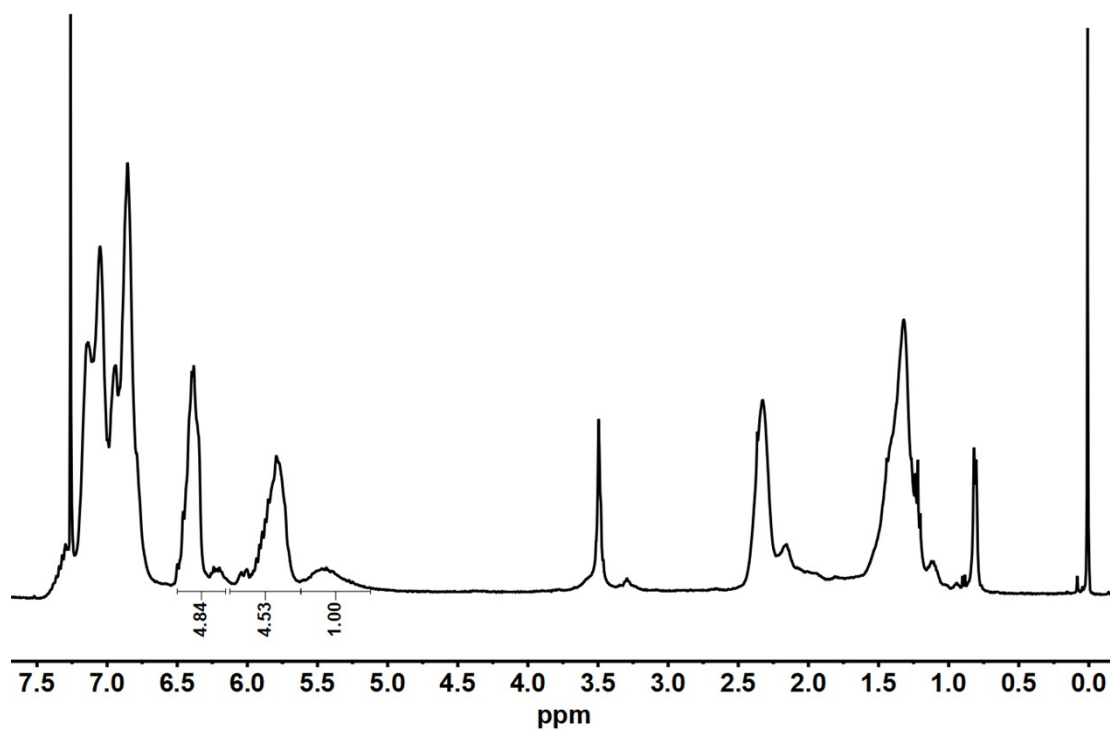

Figure S22.  $^1\text{H}$  NMR spectrum of poly(*o*-FPB) prepared by complex **1**. (Entry 3, Table 2)

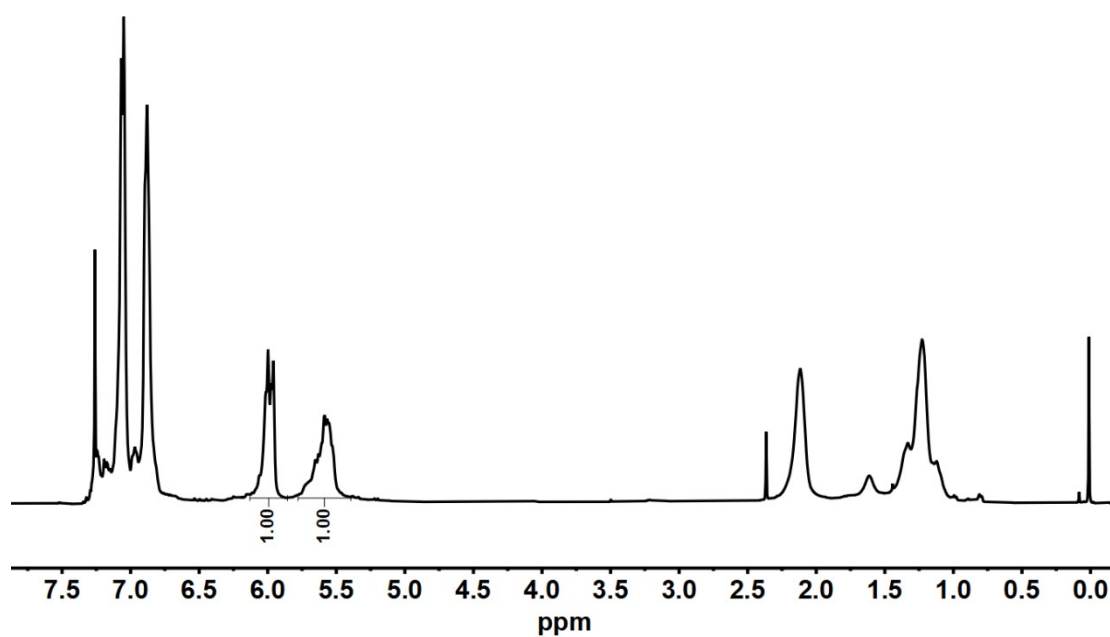

Figure S23.  $^1\text{H}$  NMR spectrum of poly(*p*-CIPB) prepared by complex **1**. (Entry 4, Table 2)

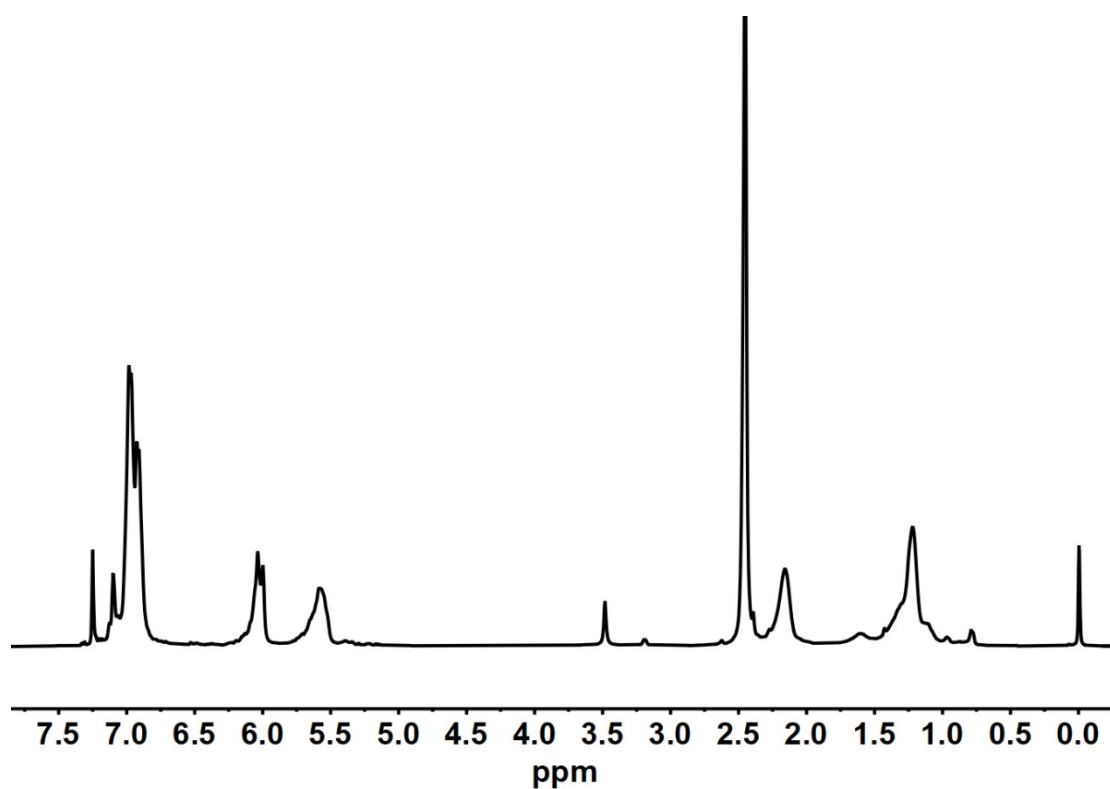

Figure S24.  $^1\text{H}$  NMR spectrum of poly(*p*-SPB) prepared by complex **1**. (Entry 4, Table 2)

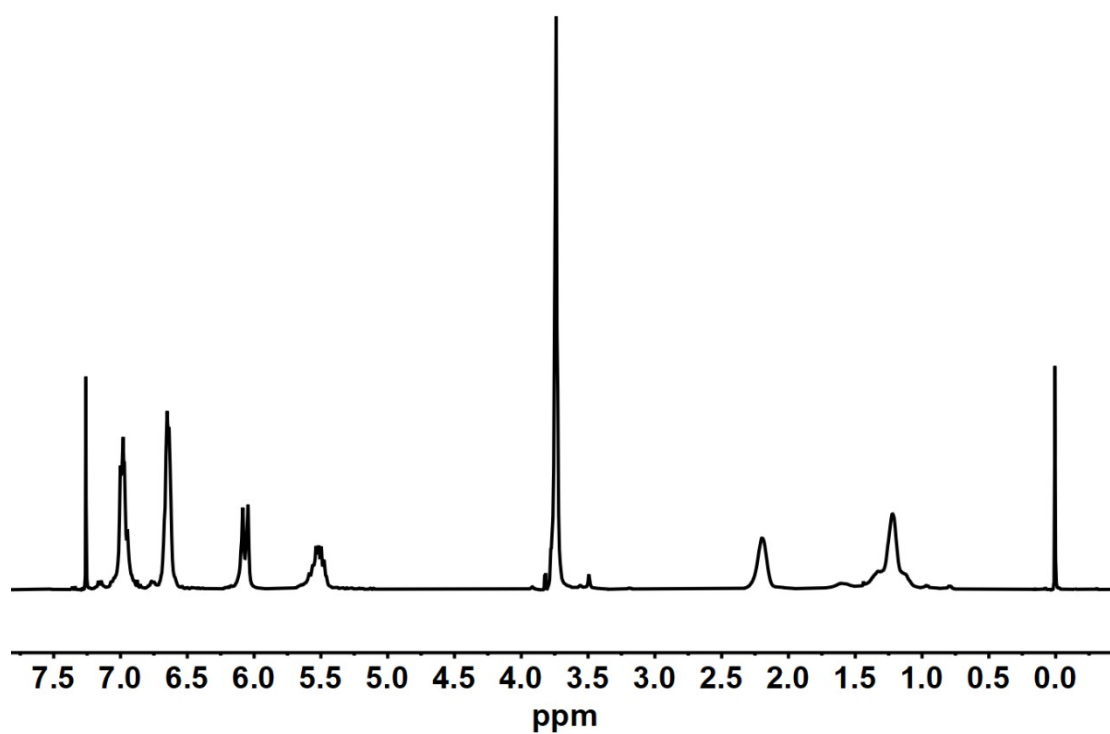

Figure S25.  $^1\text{H}$  NMR spectrum of poly(*p*-OPB) prepared by complex **1**. (Entry 4, Table 2)

Scheme S1. Homopolymerization of 1-(4-fluorophenyl)-1,3-butadiene (*p*-FPB) with bis(phosfinophenyl)amido yttrium complex.<sup>a</sup>

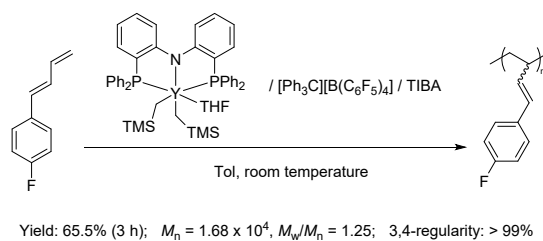

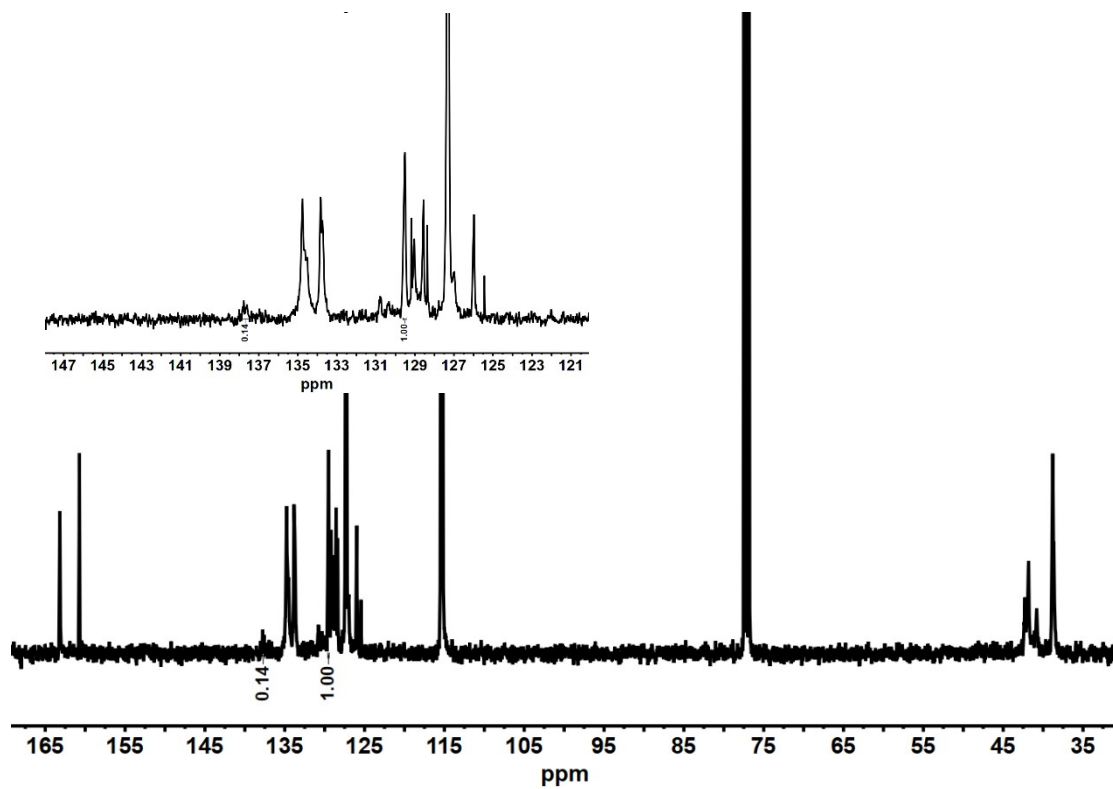

Figure S26.  $^{13}\text{C}$  NMR spectra of copolymer prepared by complex **1**. (Entry 1, Table 3)

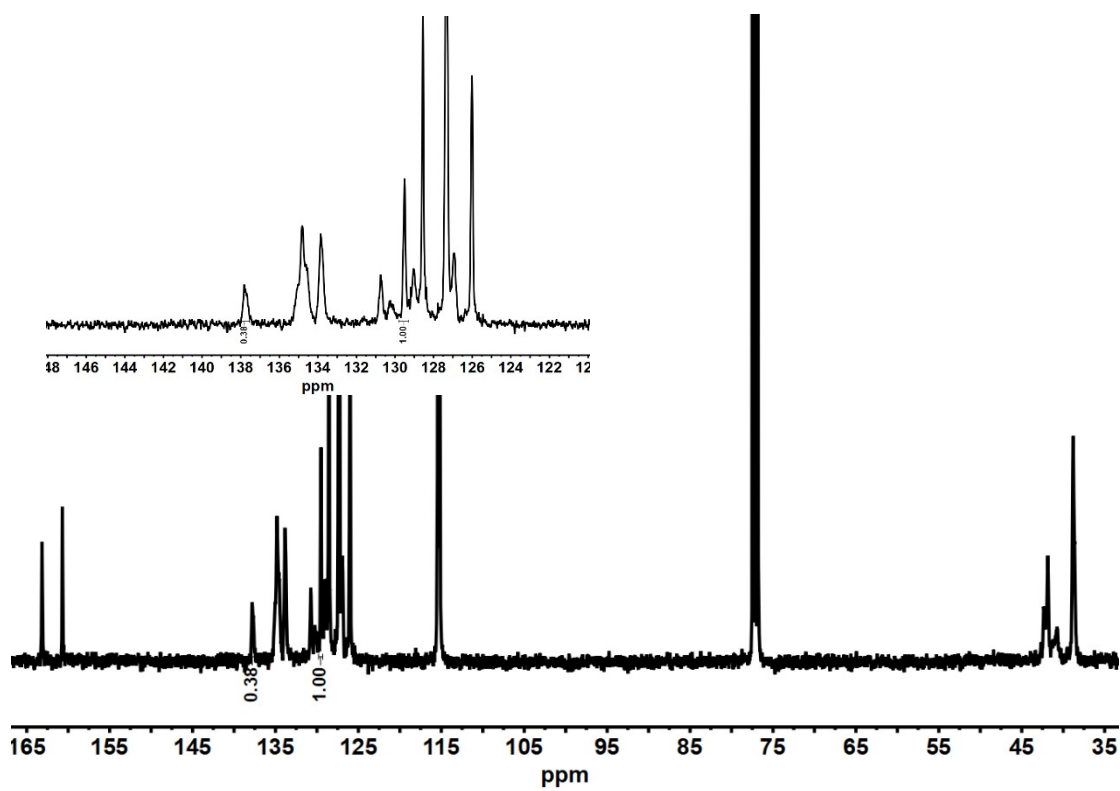

Figure S27.  $^{13}\text{C}$  NMR spectra of copolymer prepared by complex **1**. (Entry 2, Table 3)

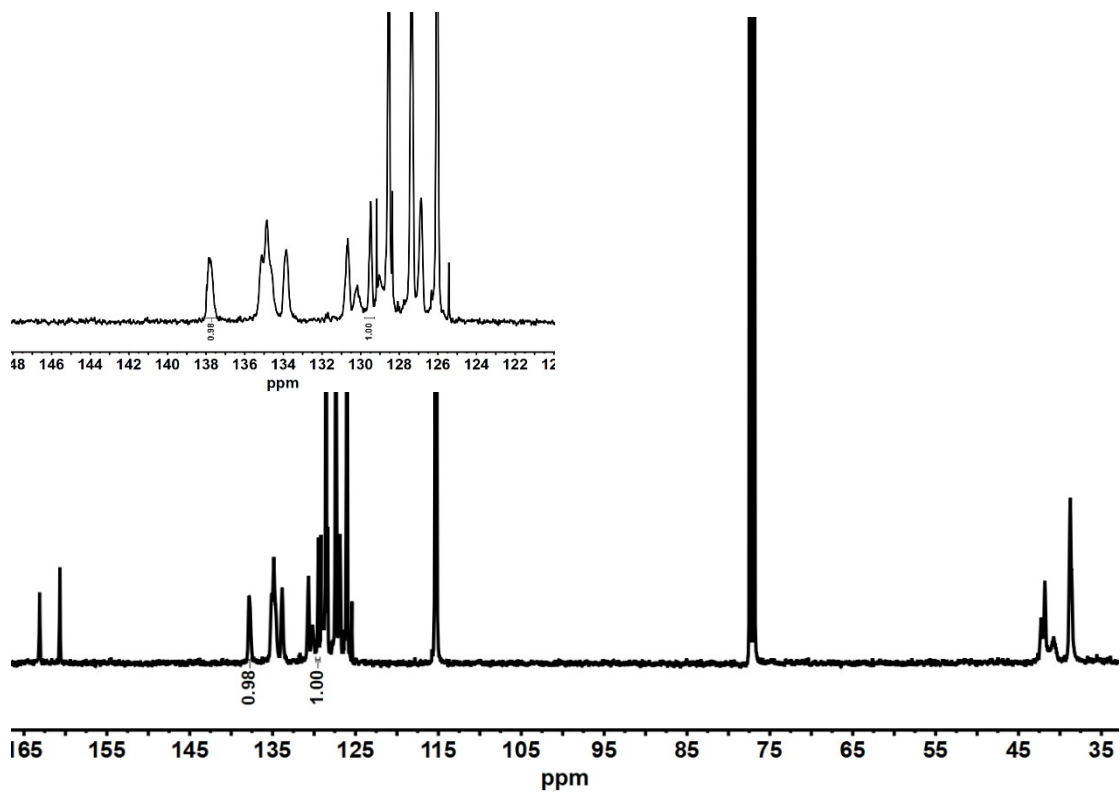

Figure S28.  $^{13}\text{C}$  NMR spectra of copolymer prepared by complex 1. (Entry 3, Table 3)

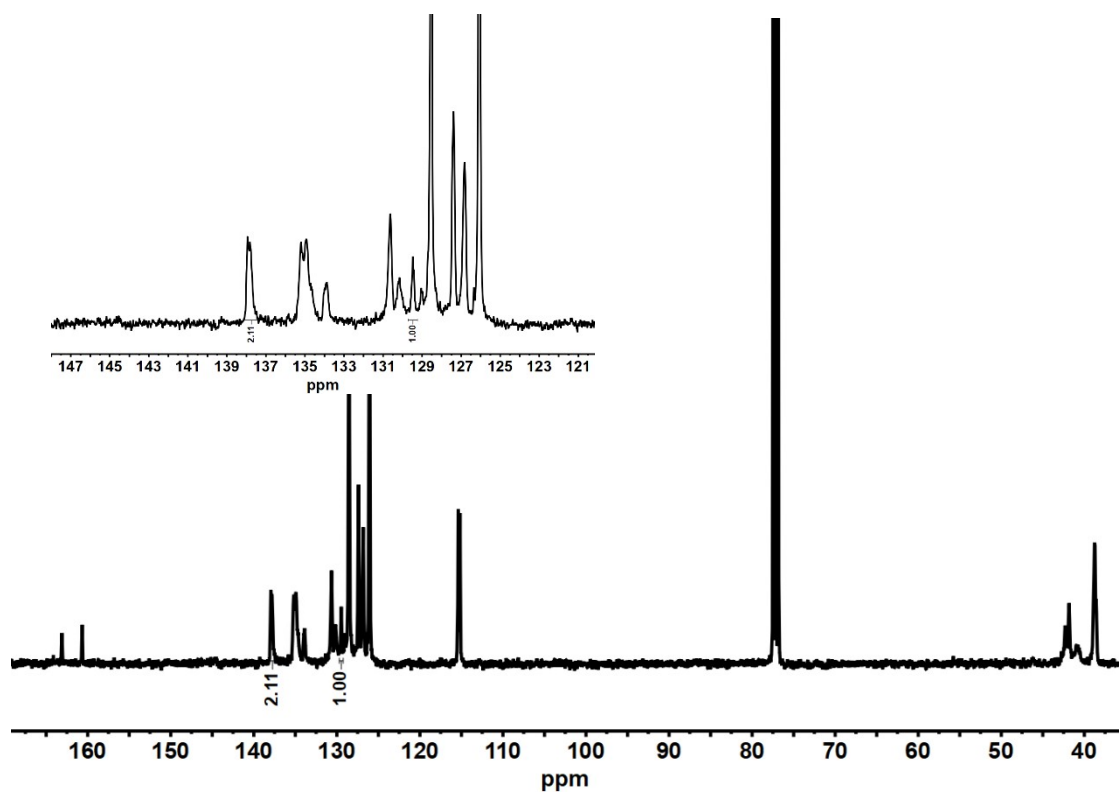

Figure S29.  $^{13}\text{C}$  NMR spectra of copolymer prepared by complex 1. (Entry 4, Table 3)



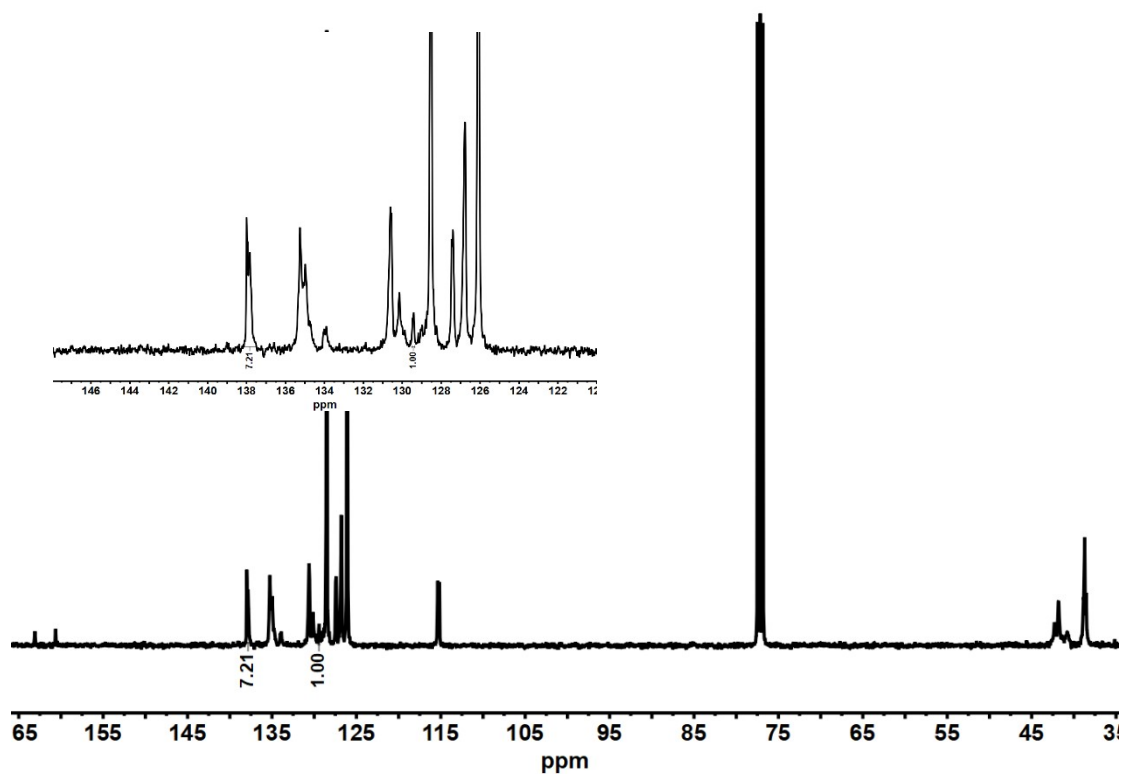

Figure S30.  $^{13}\text{C}$  NMR spectra of copolymer prepared by complex 1. (Entry 5, Table 3)

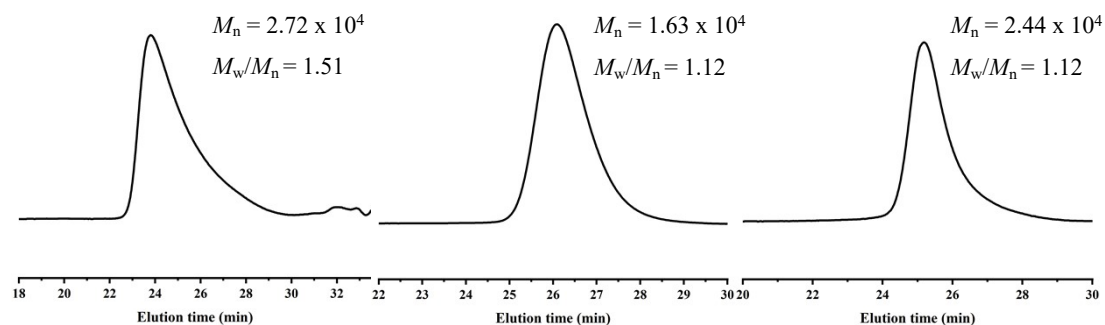

Figure S31. GPC curves of poly(*p*-FPB) prepared by complex 1. (From left to right: Entry 2, Table 1; Entry 8, Table 1; Entry 9, Table 1).

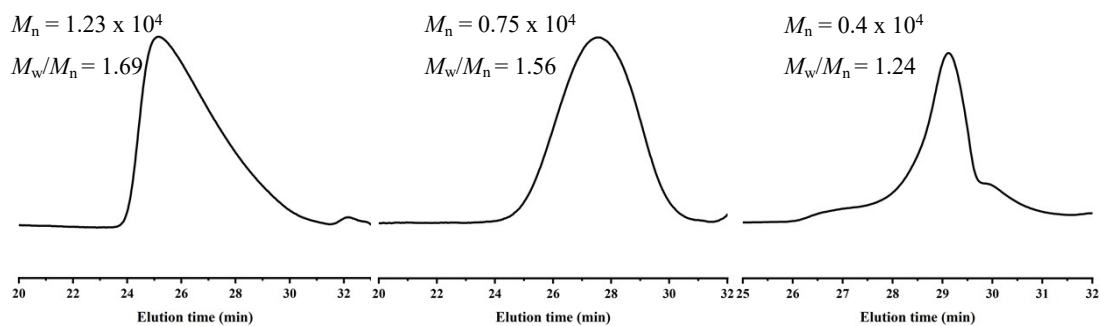

Figure S32. GPC curves of polymers with substituents at the para position of the phenyl ring prepared by complex 1. (From left to right: Entry 2, Table 2; Entry 3, Table 2; c: Entry 4, Table 2).

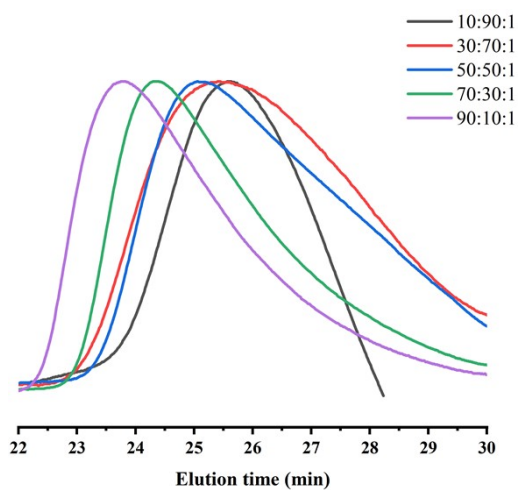

Figure S33 GPC curves of copolymers prepared by complex **1**. (Entries in Table 3).

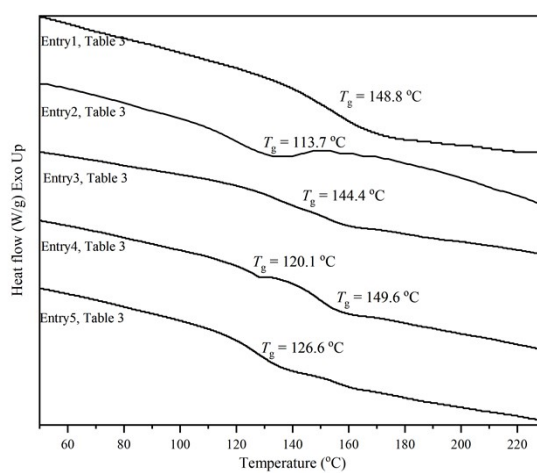

Figure S34. DSC curves of copolymers prepared by complex **1**. (Entries in Table 3).

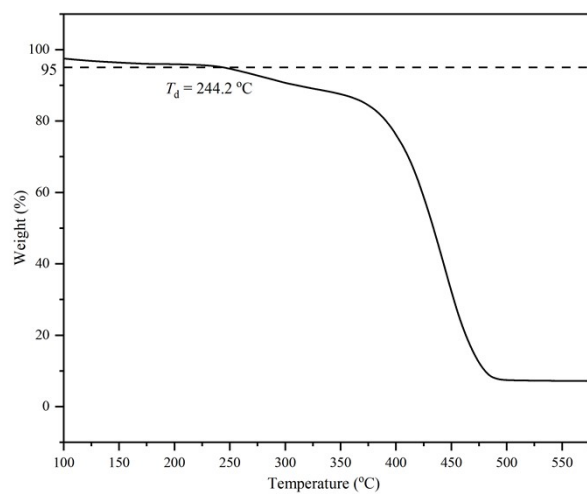

Figure S35. TGA curve of a poly(**1PB**) prepared by complex **1**. (Entry 1, Table 2).

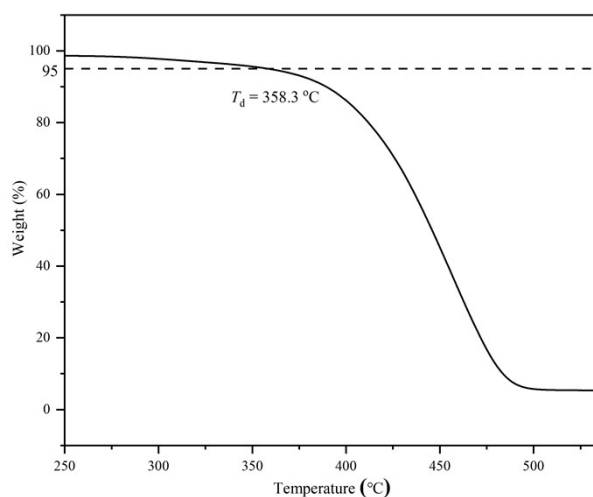

Figure S36. TGA curve of a poly(*p*-FPB) prepared by complex **1**. (Entry 7, Table 1).

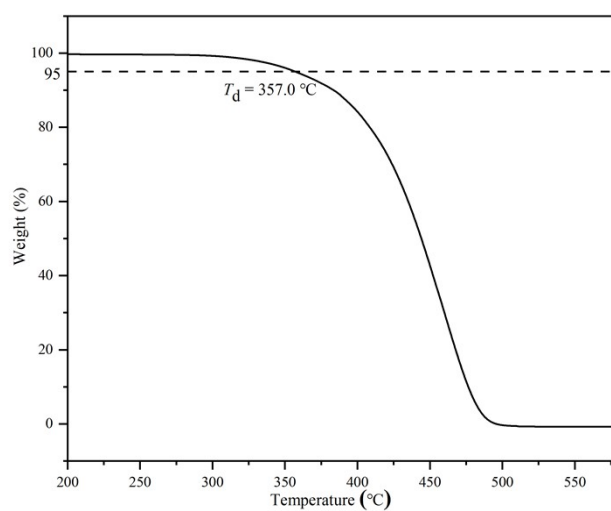

Figure S37. TGA curve of a poly(*m*-FPB) prepared by complex **1**. (Entry 2, Table 2).

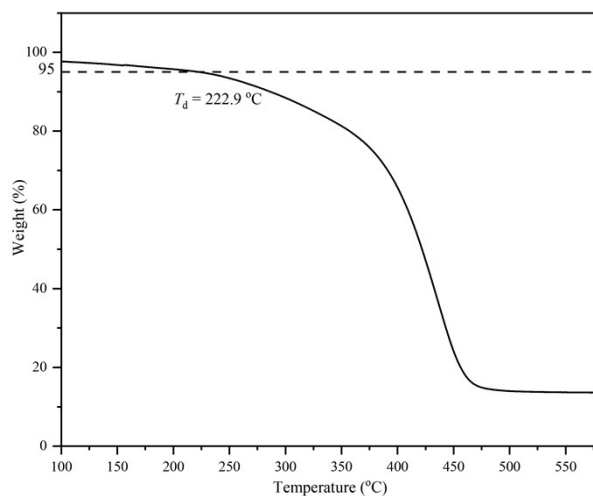

Figure S38. TGA curve of a poly(*o*-FPB) prepared by complex **1**. (Entry 3, Table 2).

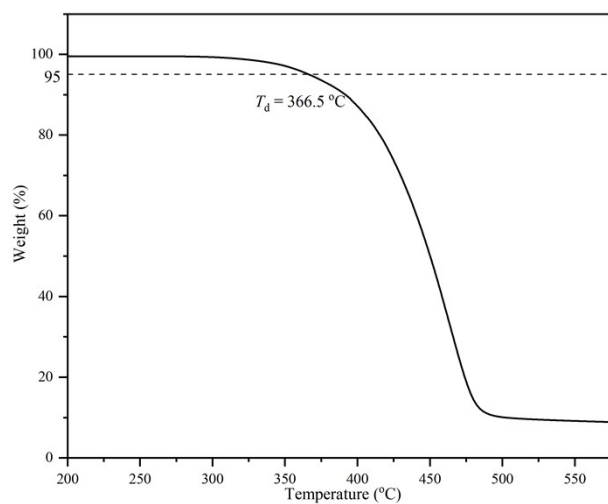

Figure S39. TGA curve of a poly(*p*-CIPB) prepared by complex 1. (Entry 4, Table 2).

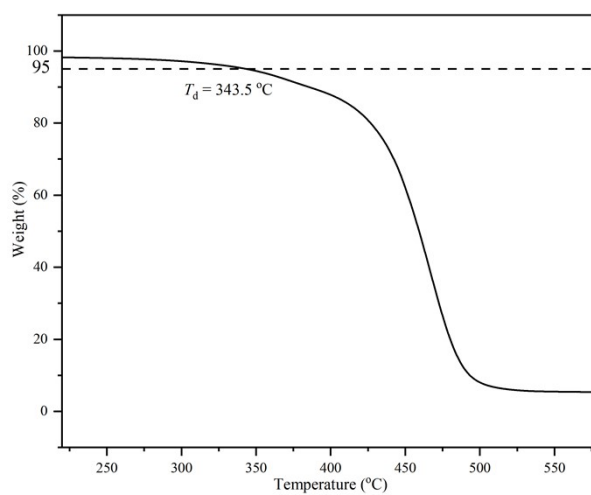

Figure S40. TGA curve of a poly(*p*-NPB) prepared by complex 1. (Entry 6, Table 2).

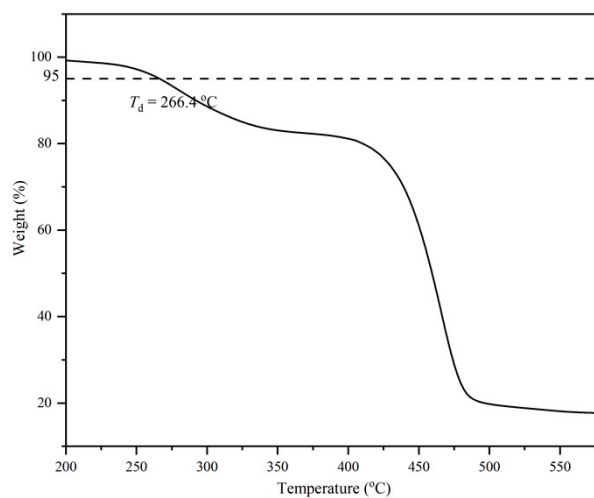

Figure S41. TGA curve of a poly(*p*-OPB) prepared by complex 1. (Entry 7, Table 2).

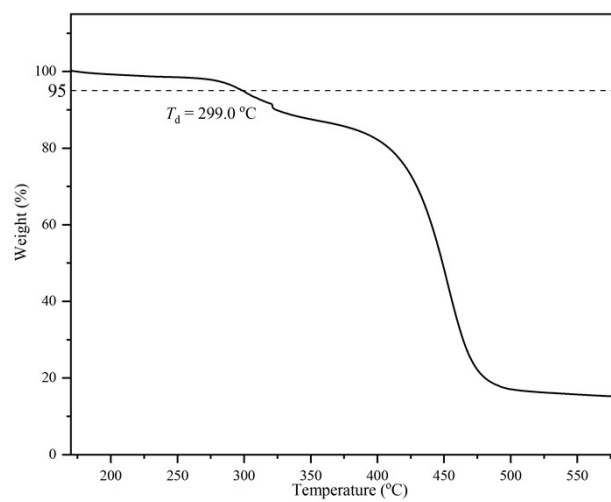

Figure S42. TGA curve of a poly(*p*-SPB) prepared by complex **1**. (Entry 8, Table 2).
